# Supplementary material
Source: PubMed Central journal article supplement (PMC4794057)
Supplement: andn021663.ww1_default.pdf [file andn021663.ww1_default.pdf]

**Supplementary tables (posted as supplied by authors)**

**Table A.**

**Socio-economic characteristics of the households in intervention and control sites**

| Characteristic                                                 | Mexico               |                      | Nicaragua            |                      |
|----------------------------------------------------------------|----------------------|----------------------|----------------------|----------------------|
|                                                                | Intervention         | Control              | Intervention         | Control              |
| Lower quality housing (temporary or semi-permanent structure)  | 3597/6163<br>(58.4%) | 3316/6174<br>(53.7%) | 0/4203<br>(0%)       | 0/4199<br>(0%)       |
| Business run from same premises as household                   | 280/6182<br>(4.5%)   | 312/6194<br>(5%)     | 857/4203<br>(20.4%)  | 878/4199<br>(20.9%)  |
| Head of household with less than five years of education       | 2630/6135<br>(42.9%) | 2411/6130<br>(39.1%) | 823/4134<br>(19.9%)  | 824/4127<br>(20.0%)  |
| Head of household without full-time remunerated employment     | 1087/6169<br>(17.6%) | 1134/6196<br>(18.3%) | 1531/4203<br>(34.5%) | 1448/4199<br>(34.5%) |
| Problems with drinking water or need to purchase bottled water | 4126/6186<br>(66.7%) | 4602/6193<br>(74.3%) | 2509/4012<br>(62.5%) | 2361/3993<br>(59.1%) |
| Female respondent to the questionnaire                         | 5042/6185<br>(81.5%) | 5025/6204<br>(81%)   | 3162/4134<br>(76.5%) | 3270/4154<br>(78.7%) |

Table B. Cluster-specific rates of principal outcomes

Cluster-specific rates of recent dengue virus infection, 3-9 year-olds, 2x or more increase of IgG across paired samples; households affected /households providing a sample in intervention and control clusters

| CLUSTER | INTER=1 | CLUSTER | INTER=2        |
|---------|---------|---------|----------------|
| 101     | 1/32    | 0.03    | 103 2/25 0.08  |
| 102     | 4/27    | 0.15    | 107 7/34 0.21  |
| 104     | 6/39    | 0.15    | 109 3/31 0.10  |
| 105     | 7/30    | 0.23    | 114 10/30 0.33 |
| 106     | 4/43    | 0.09    | 116 3/30 0.10  |
| 108     | 6/36    | 0.17    | 117 1/35 0.03  |
| 110     | 4/31    | 0.13    | 118 3/33 0.09  |
| 111     | 9/34    | 0.26    | 119 6/36 0.17  |
| 112     | 8/49    | 0.16    | 120 5/28 0.18  |
| 113     | 4/29    | 0.14    | 121 1/12 0.08  |
| 115     | 8/33    | 0.24    | 124 1/11 0.09  |
| 122     | 7/27    | 0.26    | 125 2/12 0.17  |
| 123     | 3/12    | 0.25    | 126 2/17 0.12  |
| 127     | 5/20    | 0.25    | 128 12/47 0.26 |
| 130     | 3/29    | 0.10    | 129 6/17 0.35  |
| 132     | 10/50   | 0.20    | 131 3/18 0.17  |
| 135     | 8/33    | 0.24    | 133 10/42 0.24 |
| 138     | 0/35    | 0.00    | 134 10/39 0.26 |
| 139     | 1/28    | 0.04    | 136 4/30 0.13  |
| 141     | 2/24    | 0.08    | 137 1/23 0.04  |
| 142     | 1/28    | 0.04    | 140 0/25 0.00  |
| 143     | 0/41    | 0.00    | 144 1/32 0.03  |
| 147     | 0/28    | 0.00    | 145 0/18 0.00  |
| 148     | 0/30    | 0.00    | 146 2/46 0.04  |
| 151     | 3/36    | 0.08    | 149 8/35 0.23  |
| 152     | 2/26    | 0.08    | 150 3/29 0.10  |
| 155     | 5/60    | 0.08    | 153 9/42 0.21  |
| 156     | 1/47    | 0.02    | 154 4/48 0.08  |
| 157     | 0/32    | 0.00    | 158 4/20 0.20  |
| 159     | 0/29    | 0.00    | 160 0/32 0.00  |
| 162     | 3/86    | 0.03    | 161 8/49 0.16  |
| 163     | 1/28    | 0.04    | 164 10/67 0.15 |
| 165     | 2/93    | 0.02    | 168 5/71 0.07  |
| 166     | 1/71    | 0.01    | 170 2/33 0.06  |
| 167     | 0/64    | 0.00    | 171 2/38 0.05  |
| 169     | 0/52    | 0.00    | 172 7/43 0.16  |
| 173     | 2/38    | 0.05    | 174 3/47 0.06  |
| 180     | 0/26    | 0.00    | 175 5/30 0.17  |
|         |         |         | 182 7/42 0.17  |
|         |         |         | 183 3/80 0.04  |
|         |         |         | 184 0/38 0.00  |
|         |         |         | 185 1/36 0.03  |
|         |         |         | 186 2/41 0.05  |
|         |         |         | 189 11/56 0.20 |
|         |         |         | 190 6/54 0.11  |
|         |         |         | 201 3/47 0.06  |
|         |         |         | 202 5/39 0.13  |
|         |         |         | 205 5/41 0.12  |
|         |         |         | 209 9/58 0.16  |
|         |         |         | 210 4/50 0.08  |
|         |         |         | 211 6/38 0.16  |
|         |         |         | 212 13/60 0.22 |
|         |         |         | 213 10/52 0.19 |
|         |         |         | 215 7/71 0.10  |
|         |         |         | 217 11/66 0.17 |
|         |         |         | 222 6/66 0.09  |
|         |         |         | 223 9/56 0.16  |
|         |         |         | 224 4/53 0.08  |
|         |         |         | 225 6/43 0.14  |
|         |         |         | 226 7/48 0.15  |
|         |         |         | 227 12/70 0.17 |
|         |         |         | 229 7/47 0.15  |
|         |         |         | 234 8/62 0.13  |
|         |         |         | 239 9/44 0.20  |
|         |         |         | 240 8/54 0.15  |
|         |         |         | 241 5/56 0.09  |
|         |         |         | 242 12/53 0.23 |
|         |         |         | 243 6/57 0.11  |
|         |         |         | 245 10/40 0.25 |
|         |         |         | 249 15/68 0.22 |
|         |         |         | 253 15/61 0.25 |
|         |         |         | 255 3/47 0.06  |
|         |         |         | 256 6/76 0.08  |
|         |         |         | 259 9/68 0.13  |
|         |         |         | 261 10/66 0.15 |
|         |         |         | 176 4/34 0.12  |
|         |         |         | 177 4/61 0.07  |
|         |         |         | 178 6/39 0.15  |
|         |         |         | 179 3/25 0.12  |
|         |         |         | 181 3/56 0.05  |
|         |         |         | 187 2/35 0.06  |
|         |         |         | 188 2/58 0.03  |
|         |         |         | 203 12/64 0.19 |
|         |         |         | 204 8/64 0.13  |
|         |         |         | 206 5/49 0.10  |
|         |         |         | 207 6/49 0.12  |
|         |         |         | 208 2/54 0.04  |
|         |         |         | 214 10/67 0.15 |
|         |         |         | 216 14/65 0.22 |
|         |         |         | 218 20/69 0.29 |
|         |         |         | 219 18/66 0.27 |
|         |         |         | 220 10/66 0.15 |
|         |         |         | 221 10/56 0.18 |
|         |         |         | 228 10/68 0.15 |
|         |         |         | 230 13/55 0.24 |
|         |         |         | 231 8/57 0.14  |
|         |         |         | 232 6/60 0.10  |
|         |         |         | 233 4/51 0.08  |
|         |         |         | 235 12/59 0.20 |
|         |         |         | 237 4/29 0.14  |
|         |         |         | 238 12/68 0.18 |
|         |         |         | 244 8/46 0.17  |
|         |         |         | 246 12/46 0.26 |
|         |         |         | 247 8/47 0.17  |
|         |         |         | 248 4/54 0.07  |
|         |         |         | 250 11/74 0.15 |
|         |         |         | 251 14/58 0.24 |
|         |         |         | 252 10/40 0.25 |
|         |         |         | 254 10/62 0.16 |
|         |         |         | 257 13/48 0.27 |
|         |         |         | 258 4/47 0.09  |
|         |         |         | 260 7/37 0.19  |
|         |         |         | 391/3460 0.113 |
|         |         |         | 474/3238 0.146 |



Cluster-specific rates household index (houses infested with *Ae aegypti* larvae or pupae / houses inspected) in intervention and control clusters

| CLUSTER | INTER=1 | CLUSTER | INTER=2 | CLUSTER | INTER=1 | CLUSTER | INTER=2 |      |     |        |      |
|---------|---------|---------|---------|---------|---------|---------|---------|------|-----|--------|------|
| 101     | 33/144  | 0.23    | 103     | 25/99   | 0.25    | 182     | 1/135   | 0.01 | 176 | 19/114 | 0.17 |
| 102     | 21/122  | 0.17    | 107     | 20/104  | 0.19    | 183     | 9/154   | 0.06 | 177 | 7/132  | 0.05 |
| 104     | 23/123  | 0.19    | 109     | 8/101   | 0.08    | 184     | 5/103   | 0.05 | 178 | 3/120  | 0.03 |
| 105     | 13/120  | 0.11    | 114     | 37/107  | 0.35    | 185     | 0/81    | 0.00 | 179 | 18/109 | 0.17 |
| 106     | 16/119  | 0.13    | 116     | 17/119  | 0.14    | 186     | 11/134  | 0.08 | 181 | 16/138 | 0.12 |
| 108     | 13/112  | 0.12    | 117     | 32/127  | 0.25    | 189     | 3/99    | 0.03 | 187 | 17/120 | 0.14 |
| 110     | 8/122   | 0.07    | 118     | 27/132  | 0.20    | 190     | 0/117   | 0.00 | 188 | 0/138  | 0.00 |
| 111     | 8/124   | 0.06    | 119     | 46/130  | 0.35    | 201     | 23/126  | 0.18 | 203 | 20/134 | 0.15 |
| 112     | 40/135  | 0.30    | 120     | 37/142  | 0.26    | 202     | 19/129  | 0.15 | 204 | 30/133 | 0.23 |
| 113     | 23/107  | 0.21    | 121     | 4/125   | 0.03    | 205     | 14/133  | 0.11 | 206 | 11/130 | 0.08 |
| 115     | 14/88   | 0.16    | 124     | 0/100   | 0.00    | 209     | 6/122   | 0.05 | 207 | 26/131 | 0.20 |
| 122     | 30/128  | 0.23    | 125     | 1/106   | 0.01    | 210     | 41/135  | 0.30 | 208 | 28/135 | 0.21 |
| 123     | 6/117   | 0.05    | 126     | 11/112  | 0.10    | 211     | 15/136  | 0.11 | 214 | 25/138 | 0.18 |
| 127     | 14/106  | 0.13    | 128     | 43/117  | 0.37    | 212     | 6/137   | 0.04 | 216 | 17/138 | 0.12 |
| 130     | 8/89    | 0.09    | 129     | 10/112  | 0.09    | 213     | 41/138  | 0.30 | 218 | 39/137 | 0.28 |
| 132     | 6/125   | 0.05    | 131     | 2/72    | 0.03    | 215     | 25/138  | 0.18 | 219 | 62/139 | 0.45 |
| 135     | 16/149  | 0.11    | 133     | 8/120   | 0.07    | 217     | 17/137  | 0.12 | 220 | 32/136 | 0.24 |
| 138     | 7/122   | 0.06    | 134     | 12/88   | 0.14    | 222     | 21/137  | 0.15 | 221 | 20/140 | 0.14 |
| 139     | 15/133  | 0.11    | 136     | 27/145  | 0.19    | 223     | 28/136  | 0.21 | 228 | 37/136 | 0.27 |
| 141     | 33/140  | 0.24    | 137     | 30/133  | 0.23    | 224     | 24/139  | 0.17 | 230 | 67/137 | 0.49 |
| 142     | 39/112  | 0.35    | 140     | 38/163  | 0.23    | 225     | 11/137  | 0.08 | 231 | 19/137 | 0.14 |
| 143     | 16/128  | 0.13    | 144     | 6/70    | 0.09    | 226     | 20/140  | 0.14 | 232 | 21/139 | 0.15 |
| 147     | 42/108  | 0.39    | 145     | 15/61   | 0.25    | 227     | 22/140  | 0.16 | 233 | 39/139 | 0.28 |
| 148     | 29/129  | 0.22    | 146     | 37/131  | 0.28    | 229     | 6/136   | 0.04 | 235 | 59/135 | 0.44 |
| 151     | 10/139  | 0.07    | 149     | 50/117  | 0.43    | 234     | 55/136  | 0.40 | 237 | 30/133 | 0.23 |
| 152     | 9/72    | 0.13    | 150     | 17/106  | 0.16    | 239     | 19/133  | 0.14 | 238 | 48/139 | 0.35 |
| 155     | 23/127  | 0.18    | 153     | 45/119  | 0.38    | 240     | 24/137  | 0.18 | 244 | 34/134 | 0.25 |
| 156     | 19/117  | 0.16    | 154     | 56/146  | 0.38    | 241     | 9/136   | 0.07 | 246 | 11/131 | 0.08 |
| 157     | 28/111  | 0.25    | 158     | 30/90   | 0.33    | 242     | 24/136  | 0.18 | 247 | 45/137 | 0.33 |
| 159     | 5/102   | 0.05    | 160     | 33/94   | 0.35    | 243     | 7/136   | 0.05 | 248 | 19/137 | 0.14 |
| 162     | 2/139   | 0.01    | 161     | 21/143  | 0.15    | 245     | 11/134  | 0.08 | 250 | 35/133 | 0.26 |
| 163     | 11/75   | 0.15    | 164     | 12/133  | 0.09    | 249     | 41/137  | 0.30 | 251 | 10/137 | 0.07 |
| 165     | 19/150  | 0.13    | 168     | 28/131  | 0.21    | 253     | 32/134  | 0.24 | 252 | 23/133 | 0.17 |
| 166     | 6/149   | 0.04    | 170     | 20/93   | 0.22    | 255     | 10/117  | 0.09 | 254 | 29/138 | 0.21 |
| 167     | 1/118   | 0.01    | 171     | 26/137  | 0.19    | 256     | 13/152  | 0.09 | 257 | 8/132  | 0.06 |
| 169     | 10/155  | 0.06    | 172     | 2/142   | 0.01    | 259     | 8/137   | 0.06 | 258 | 43/134 | 0.32 |
| 173     | 5/155   | 0.03    | 174     | 8/114   | 0.07    | 261     | 48/138  | 0.35 | 260 | 10/132 | 0.08 |
| 180     | 6/115   | 0.05    | 175     | 9/83    | 0.11    |         |         |      |     |        |      |

1296/9508 0.136

1827/9299 0.196

Cluster-specific container index (containers positive for *Aedes aegypti* larvae or pupa/total containers examined) in intervention and control clusters

| CLUSTER | INTER=1 | CLUSTER | INTER=2          |
|---------|---------|---------|------------------|
| 101     | 65/558  | 0.12    | 103 34/435 0.08  |
| 102     | 37/471  | 0.08    | 107 25/342 0.07  |
| 104     | 39/375  | 0.10    | 109 19/640 0.03  |
| 105     | 18/443  | 0.04    | 114 49/509 0.10  |
| 106     | 31/718  | 0.04    | 116 28/574 0.05  |
| 108     | 15/248  | 0.06    | 117 58/859 0.07  |
| 110     | 10/455  | 0.02    | 118 41/698 0.06  |
| 111     | 10/514  | 0.02    | 119 115/963 0.12 |
| 112     | 64/979  | 0.07    | 120 68/723 0.09  |
| 113     | 33/443  | 0.07    | 121 4/315 0.01   |
| 115     | 20/358  | 0.06    | 124 1/348 0.00   |
| 122     | 48/285  | 0.17    | 125 2/384 0.01   |
| 123     | 11/332  | 0.03    | 126 18/390 0.05  |
| 127     | 25/304  | 0.08    | 128 67/480 0.14  |
| 130     | 8/198   | 0.04    | 129 10/276 0.04  |
| 132     | 9/337   | 0.03    | 131 4/145 0.03   |
| 135     | 28/346  | 0.08    | 133 18/532 0.03  |
| 138     | 15/190  | 0.08    | 134 20/201 0.10  |
| 139     | 22/290  | 0.08    | 136 32/263 0.12  |
| 141     | 41/519  | 0.08    | 137 45/285 0.16  |
| 142     | 57/341  | 0.17    | 140 39/322 0.12  |
| 143     | 23/297  | 0.08    | 144 9/181 0.05   |
| 147     | 72/350  | 0.21    | 145 21/148 0.14  |
| 148     | 44/347  | 0.13    | 146 44/333 0.13  |
| 151     | 13/960  | 0.01    | 149 88/384 0.23  |
| 152     | 11/252  | 0.04    | 150 24/277 0.09  |
| 155     | 31/800  | 0.04    | 153 60/642 0.09  |
| 156     | 40/823  | 0.05    | 154 99/710 0.14  |
| 157     | 37/704  | 0.05    | 158 56/694 0.08  |
| 159     | 9/647   | 0.01    | 160 53/611 0.09  |
| 162     | 4/829   | 0.01    | 161 31/1054 0.03 |
| 163     | 14/689  | 0.02    | 164 19/813 0.02  |
| 165     | 30/784  | 0.04    | 168 44/874 0.05  |
| 166     | 10/896  | 0.01    | 170 35/597 0.06  |
| 167     | 1/697   | 0.00    | 171 49/470 0.10  |
| 169     | 14/979  | 0.01    | 172 9/410 0.02   |
| 173     | 9/480   | 0.02    | 174 10/474 0.02  |
| 180     | 11/318  | 0.03    | 175 16/254 0.06  |
|         |         |         | 182 3/314 0.01   |
|         |         |         | 183 14/435 0.03  |
|         |         |         | 184 7/383 0.02   |
|         |         |         | 185 3/240 0.01   |
|         |         |         | 186 13/473 0.03  |
|         |         |         | 189 4/252 0.02   |
|         |         |         | 190 0/335 0.00   |
|         |         |         | 201 32/619 0.05  |
|         |         |         | 202 18/523 0.03  |
|         |         |         | 205 18/377 0.05  |
|         |         |         | 209 6/333 0.02   |
|         |         |         | 210 42/554 0.08  |
|         |         |         | 211 20/428 0.05  |
|         |         |         | 212 6/526 0.01   |
|         |         |         | 213 57/667 0.09  |
|         |         |         | 215 62/601 0.10  |
|         |         |         | 217 10/415 0.02  |
|         |         |         | 222 18/492 0.04  |
|         |         |         | 223 28/498 0.06  |
|         |         |         | 224 29/533 0.05  |
|         |         |         | 225 14/531 0.03  |
|         |         |         | 226 22/565 0.04  |
|         |         |         | 227 27/485 0.06  |
|         |         |         | 229 5/386 0.01   |
|         |         |         | 234 71/667 0.11  |
|         |         |         | 239 20/401 0.05  |
|         |         |         | 240 34/620 0.05  |
|         |         |         | 241 9/577 0.02   |
|         |         |         | 242 13/440 0.03  |
|         |         |         | 243 9/469 0.02   |
|         |         |         | 245 13/335 0.04  |
|         |         |         | 249 75/588 0.13  |
|         |         |         | 253 63/826 0.08  |
|         |         |         | 255 20/545 0.04  |
|         |         |         | 256 17/725 0.02  |
|         |         |         | 259 10/498 0.02  |
|         |         |         | 261 63/525 0.12  |
|         |         |         | 176 29/378 0.08  |
|         |         |         | 177 8/280 0.03   |
|         |         |         | 178 10/314 0.03  |
|         |         |         | 179 31/303 0.19  |
|         |         |         | 181 39/392 0.10  |
|         |         |         | 187 21/386 0.05  |
|         |         |         | 188 0/427 0.00   |
|         |         |         | 203 20/469 0.04  |
|         |         |         | 204 32/462 0.07  |
|         |         |         | 206 13/358 0.04  |
|         |         |         | 207 31/354 0.09  |
|         |         |         | 208 31/446 0.07  |
|         |         |         | 214 37/510 0.07  |
|         |         |         | 216 24/502 0.05  |
|         |         |         | 218 88/579 0.15  |
|         |         |         | 219 106/690 0.15 |
|         |         |         | 220 48/594 0.08  |
|         |         |         | 221 20/542 0.04  |
|         |         |         | 228 56/483 0.12  |
|         |         |         | 230 125/650 0.19 |
|         |         |         | 231 22/469 0.05  |
|         |         |         | 232 24/605 0.04  |
|         |         |         | 233 59/601 0.10  |
|         |         |         | 235 90/627 0.14  |
|         |         |         | 237 40/406 0.10  |
|         |         |         | 238 64/764 0.08  |
|         |         |         | 244 46/556 0.08  |
|         |         |         | 246 14/391 0.04  |
|         |         |         | 247 71/629 0.11  |
|         |         |         | 248 25/468 0.05  |
|         |         |         | 250 54/461 0.12  |
|         |         |         | 251 15/597 0.03  |
|         |         |         | 252 34/558 0.06  |
|         |         |         | 254 35/536 0.07  |
|         |         |         | 257 9/491 0.02   |
|         |         |         | 258 54/601 0.09  |
|         |         |         | 260 15/350 0.04  |
|         |         |         | 1870/35533 0.053 |
|         |         |         | 2804/34855 0.080 |





**Supplementary Table C. Primary and secondary outcomes, intention to treat, household as unit of analysis (Odds ratio, first difference and Intra-class correlation coefficient); generalised linear mixed model, intervention as fixed effect, cluster as random effect**

| Primary outcomes                                                                                                                                   | Intervention clusters | Control clusters | Odds ratio<br>95%CI | First difference<br>95%CI | ICC*  |
|----------------------------------------------------------------------------------------------------------------------------------------------------|-----------------------|------------------|---------------------|---------------------------|-------|
| <b>Serology**:</b> household evidence of recent dengue virus infection, 3-9 year-olds, 2x or more increase of IgG across paired samples            | 391/3460              | 474/3238         | 0.74<br>0.57-0.94   | -0.031<br>-0.057 -0.005   | 0.031 |
| <b>Self-reported dengue illness:</b> households reporting in last year/responding households                                                       | 542/9526              | 660/9302         | 0.79<br>0.64-0.98   | -0.013<br>-0.024 -0.001   | 0.021 |
| <b>House index:</b> houses infested with <i>Ae aegypti</i> larvae or pupae / houses inspected                                                      | 1296/9508             | 1827/9299        | 0.65<br>0.51-0.83   | -0.059<br>-0.091 -0.026   | 0.075 |
| <b>Container index:</b> containers with <i>Ae aegypti</i> larvae or pupae / containers inspected (households above study average for index 0.1)    | 1551/9528             | 2154/9309        | 0.65<br>0.47 0.77   | -0.073<br>-0.106 -0.039   | 0.070 |
| <b>Breteau index:</b> containers with <i>Ae aegypti</i> larvae or pupae / houses inspected (households above study average for index 2.5)          | 97/9267               | 178/9005         | 0.55<br>0.34 0.86   | -0.005<br>-0.009 -0.002   | 0.071 |
| <b>Pupae per person index:</b> Number of <i>Ae aegypti</i> pupae / residential population (household with pupas)                                   | 549/9508              | 885/9299         | 0.56<br>0.41 0.77   | -0.031<br>-0.049 -0.014   | 0.049 |
| <u>Secondary outcomes</u>                                                                                                                          |                       |                  |                     |                           |       |
| <b>Conscious knowledge:</b> Recognise sample of larva and know its relevance (Mexico only)                                                         | 5349/5434             | 5092/5223        | 1.50<br>0.99 2.26   | 0.006<br>-0.0001 0.013    | 0.097 |
| <b>Opinion of pesticides:</b> Agree (direct question) that temephos and fumigation are the best way to avoid mosquitoes/ households interviewed    | 7512/9442             | 7585/9224        | 0.80<br>0.67 0.95   | -0.032<br>-0.056 -0.008   | 0.029 |
| <b>Subjective norm:</b> Your neighbours believe its worthwhile to put time and energy into eliminating breeding sites in their homes (Mexico only) | 3063/4337             | 2875/4179        | 1.09<br>0.87 1.38   | 0.020<br>-0.027 0.070     | 0.066 |
| <b>Intention to change:</b> Do you plan to dedicate time and money each week to eliminate breeding sites (Mexico)                                  | 4360/5380             | 4052/5169        | 1.15<br>0.92 1.44   | 0.023<br>-0.013 0.060     | 0.071 |
| <b>Collective self-efficacy:</b> Agree communities can themselves control dengue / households interviewed                                          | 4519/9338             | 3983/9109        | 1.23<br>1.08-1.40   | 0.052<br>0.023 0.082      | 0.030 |
| <b>Socialisation/discussion:</b> Talk with neighbours about how to avoid mosquitoes                                                                | 4030/9503             | 3644/9291        | 1.12<br>0.90 1.38   | 0.027<br>-0.029 0.077     | 0.087 |
| <b>Purchased pesticide:</b> households that purchased in the last month /households interviewed                                                    | 4800/9481             | 5097/9256        | 0.84<br>0.73 0.96   | -0.044<br>-0.08 -0.009    | 0.032 |
| <b>Social capital:</b> Neighbours in this street help one another out                                                                              | 6000/9489             | 5780/9266        | 1.03<br>0.87 1.23   | 0.008<br>-0/031 0.047     | 0.048 |

\*ICC estimated for control group \*\* Proportion of households with a positive case, not total positive cases
