# Supplementary material
Source: PubMed Central journal article supplement (PMC4794057)

Appendix 3: Primary outcomes and confidence intervals for each group with cluster as the unit of analysis [posted as supplied by author]

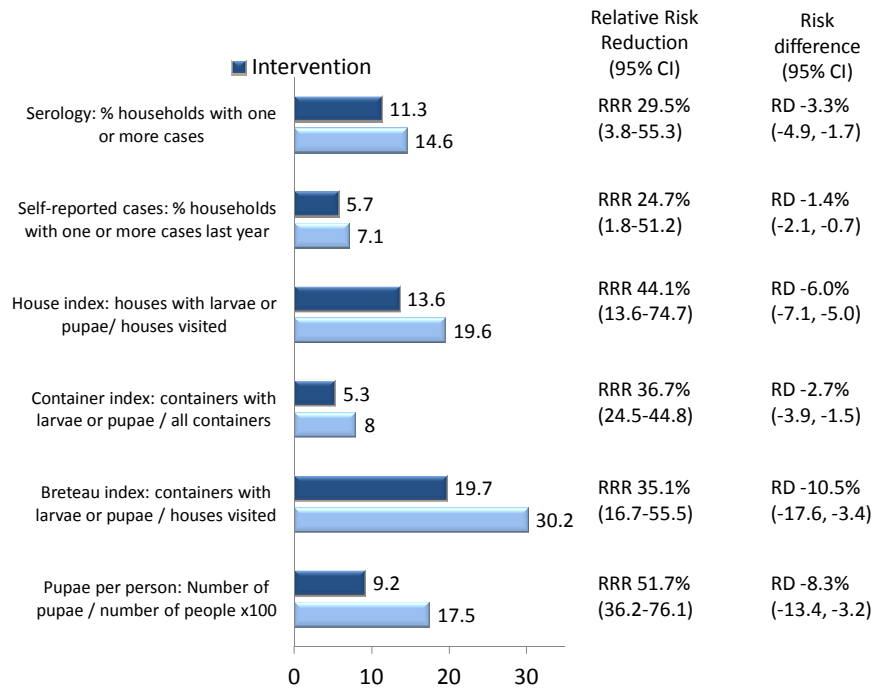

Supplement: andn021663.ww3_default.pdf [file andn021663.ww3_default.pdf]
